# Supplementary material for: Peroxy and alkoxy radicals from 2-methyl-3-buten-2-ol
Source: Royal Society of Chemistry journal article supplement (doi:10.1039/b512186h), 2005-11-30
Supplement: b512186h.pdf [file b512186h.pdf]

**T. S. Dibble and T. Pham**  
**Peroxy and alkoxy radicals from 2-methyl-3-buten-2-ol**

**Consisting of**  
 Tables of Electronic and Zero-point energies  
 Figures of the Structures of all reactants  
 Tables of Cartesian Coordinates of all reactants and transition states

**Table S1.** B3LYP/6-31G(d,p) Electronic Energies (E, Hartree) and zero-point energies (ZPE, Hartrees) of **P1**, **P2**, **A1**, **A2**, and **A3**.

| Species               | E<br>(B3LYP) | ZPE<br>(B3LYP) |
|-----------------------|--------------|----------------|
| <b>P1</b> (2→4,4→3*)  | -497.92625   | 0.16730        |
| <b>P1</b> (4→2,2→3*)  | -497.92546   | 0.16731        |
| <b>P1</b> (2→3*)      | -497.91779   | 0.16564        |
| <b>P1</b> (4→3*)      | -497.91942   | 0.16581        |
| <b>P1</b> (2→4)       | -497.92029   | 0.16618        |
| <b>P1</b> (4→2)       | -497.91836   | 0.16602        |
| <b>P1</b> (none)      | -497.91506   | 0.16520        |
| <b>P2</b> (2→3,3→4*)  | -497.92601   | 0.16638        |
| <b>P2</b> (2→3,3→4*') | -497.92481   | 0.16615        |
| <b>P2</b> (3→2,2→4*)  | -497.92495   | 0.16682        |
| <b>P2</b> (2→4*)      | -497.91903   | 0.16629        |
| <b>P2</b> (3→4*)      | -497.92498   | 0.16595        |
| <b>P2</b> (2→3)       | -497.92345   | 0.16602        |
| <b>P2</b> (3→2)       | -497.92049   | 0.16565        |
| <b>P2</b> (none)      | -497.92074   | 0.16545        |
| <b>A1</b> (4→2,2→3*)  | -422.76485   | 0.16169        |
| <b>A1</b> (2→4,4→3*)  | -422.76434   | 0.16153        |
| <b>A1</b> (2→3*)      | -422.76269   | 0.16109        |
| <b>A1</b> (4→3*)      | -422.76325   | 0.16103        |
| <b>A1</b> (2→4)       | -422.75784   | 0.15999        |
| <b>A1</b> (4→2)       | -422.76265   | 0.16105        |
| <b>A2</b> (3→2,2→4*)  | -422.76799   | 0.16156        |
| <b>A2</b> (2→3,3→4*)  | -422.76233   | 0.16062        |
| <b>A2</b> (2→4*)      | -422.75994   | 0.16137        |
| <b>A2</b> (3→4*)      | -422.76137   | 0.16039        |
| <b>A2</b> (2→3)       | -422.76063   | 0.15996        |
| <b>A2</b> (3→2)       | -422.76124   | 0.16025        |
| <b>A3</b> (3→4,4→2*)  | -422.76766   | 0.16178        |
| <b>A3</b> (4→3,3→2*)  | -422.76438   | 0.16205        |
| <b>A3</b> (3→2*)      | -422.75779   | 0.16144        |
| <b>A3</b> (4→2*)      | -422.76205   | 0.16123        |

|                |            |         |
|----------------|------------|---------|
| <b>A3(3→4)</b> | -422.75924 | 0.16107 |
| <b>A3(4→3)</b> | -422.75831 | 0.16094 |

**Table S2.** B3LYP/6-31G(d,p) Electronic Energies (E, Hartree) and zero-point energies (ZPE, Hartrees) of Transition states for scission and 1,5 H-shift of **A1**, **A2**, and **A3**.

| Reactant            | Reaction Type | E          | ZPE     |
|---------------------|---------------|------------|---------|
| <b>A1(4→2,2→3*)</b> | scission 1    | -422.75201 | 0.15906 |
|                     | scission 2    | -422.75449 | 0.15915 |
| <b>A1(2→4,4→3*)</b> | scission 1    | -422.74439 | 0.15851 |
|                     | scission 2    | -422.76082 | 0.15976 |
| <b>A1(2→3*)</b>     | scission 1    | -422.75235 | 0.15876 |
|                     | scission 2    | -422.7549  | 0.15925 |
| <b>A1(4→3*)</b>     | scission 1    | -422.74651 | 0.15777 |
|                     | scission 2    | -422.75996 | 0.15951 |
| <b>A1(2→4)</b>      | scission 1    | -422.74503 | 0.15846 |
|                     | scission 2    | -422.75662 | 0.15885 |
| <b>A1(4→2)</b>      | scission 1    | -422.75160 | 0.15825 |
|                     | scission 2    | -422.75326 | 0.15934 |
| <b>A2(3→2,2→4*)</b> | scission      | -422.75823 | *       |
|                     | 1,5 H-shift   | -422.75501 | 0.15614 |
| <b>A2(2→3,3→4*)</b> | scission      | -422.74659 | 0.15806 |
| <b>A2(2→4*)</b>     | scission      | -422.75041 | 0.15855 |
|                     | 1,5 H-shift   | -422.74040 | 0.15622 |
| <b>A2(3→4*)</b>     | scission      | -422.74331 | *       |
|                     | 1,5 H-shift   | -422.74200 | 0.15638 |
| <b>A2(2→3)</b>      | scission      | -422.74239 | 0.15783 |
|                     | 1,5 H-shift   | -422.73818 | 0.15589 |
| <b>A2(3→2)</b>      | scission      | -422.74270 | 0.15798 |
|                     | 1,5 H-shift   | -422.73917 | 0.15586 |
| <b>A3(3→4,4→2*)</b> | scission      | -422.76366 | 0.16009 |
| <b>A3(4→3,3→2*)</b> | scission      | -422.75195 | 0.15937 |
| <b>A3(3→2*)</b>     | scission      | -422.74922 | 0.15905 |
| <b>A3(4→2*)</b>     | scission      | -422.75648 | 0.15950 |
| <b>A3(3→4)</b>      | scission      | -422.75626 | 0.15971 |
| <b>A3(4→3)</b>      | scission      | -422.74933 | 0.15907 |

\* The actual transition state was not found. The number given is an estimate based on scanning energy versus breaking C-C bond length, and the ZPE is not known.

**Table S3.** B3LYP/6-31G(d,p) and BB1K/6-31+G(d,p) Electronic Energies (E, Hartree) and zero-point energies (ZPE, Hartrees) of Selected conformers of **A1-A3** and their Transition States for H-atom transfer across H-bonds. Values reported in Table S1 are not repeated.

| Species                                | E<br>(B3LYP) | ZPE<br>(B3LYP) | E<br>(BB1K) | ZPE<br>(BB1K) |
|----------------------------------------|--------------|----------------|-------------|---------------|
| <b>A1</b> (4→3*)                       | S1           | S1             | -422.57101  | 0.16481       |
| <b>A1</b> (2→3*)                       | S1           | S1             | -422.57296  | 0.16406       |
| <b>A2</b> (2→4*)                       | S1           | S1             | -422.56992  | 0.16545       |
| <b>A2</b> (3→4*)                       | S1           | S1             | -422.57321  | 0.16427       |
| <b>A3</b> (3→2*)                       | S1           | S1             | -422.56841  | 0.16612       |
| <b>A3</b> (4→2*)                       | S1           | S1             | -422.56973  | 0.16505       |
| [ <b>A1</b> (4→3*) → <b>A2</b> (3→4*)] | -422.73947   | 0.15596        | -422.53733  | 0.15974       |
| [ <b>A1</b> (2→3*)→ <b>A3</b> (3→2*)]  | -422.74094   | 0.156784       | --          | --            |
| [ <b>A2</b> (2→4*)→ <b>A3</b> (4→2*)]  | -422.75275   | 0.155853       | -422.55244  | 0.15906       |

**Figure S1.** Structure of doubly hydrogen-bonded conformers of peroxy radicals **P1** and **P2**. Thin lines indicate hydrogen bonds. O-H distances (Ångstroms) and OH--O angles (degrees) are listed for hydrogen bonds.

**Figure S2.** Structure of various conformers of alkoxy radical **A1-A3**. Thin lines indicate hydrogen bonds. O-H distances (Ångstroms) and OH--O angles (degrees) are listed for hydrogen bonds.

**Figure S3.** Relative energies of the various conformers of alkoxy radicals **A1-A3**.

**Figure S4.** Transition state structures for selected  $\beta$ -scission reactions of **A1-A3**. Thin lines indicate hydrogen bonds. Selected interatomic distances (Ångstroms) and angles (degrees) are listed.

**Figure S5.** Transition state structures for selected 1,5 H-shift reactions of **A2**. Thin lines indicate hydrogen bonds. Selected interatomic distances (Ångstroms) and angles (degrees) are listed.

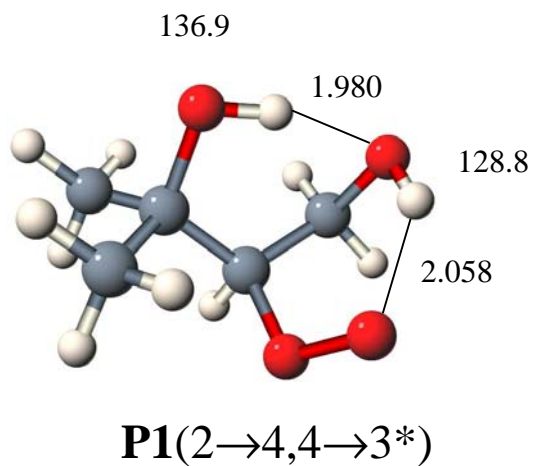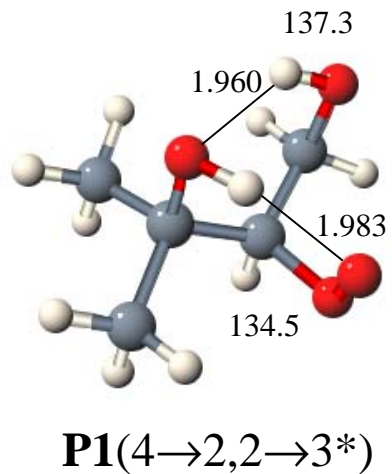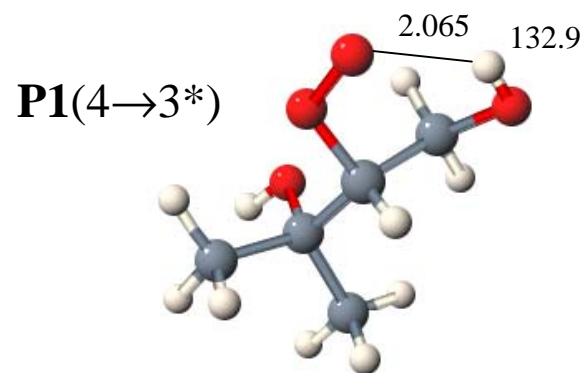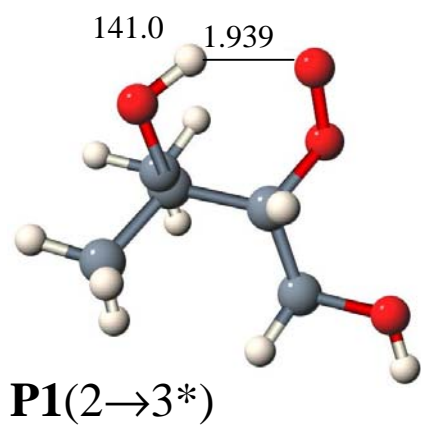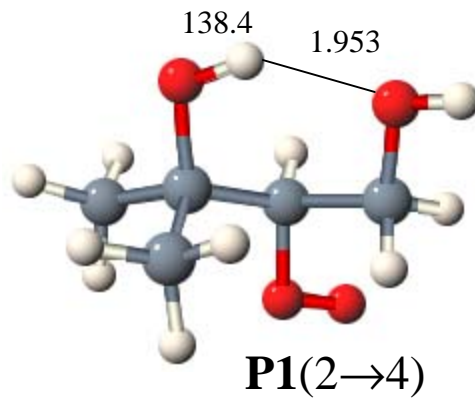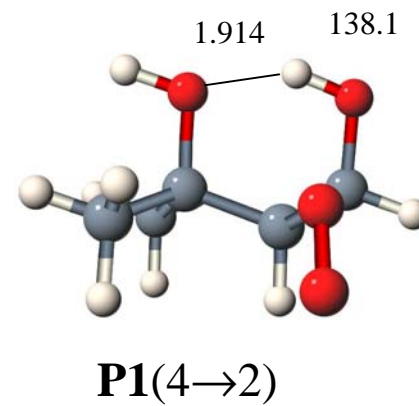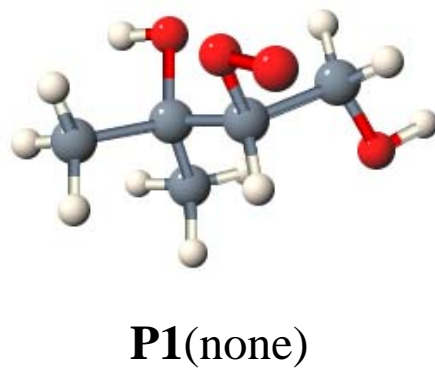

Figure S1

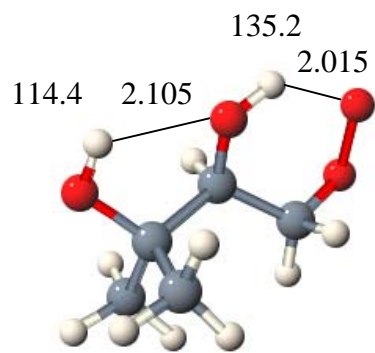

**P2(2→3,3→4\*)**

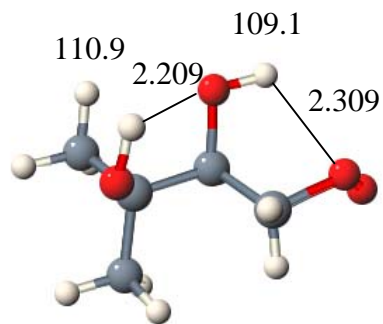

**P2(2→3,3→4')**

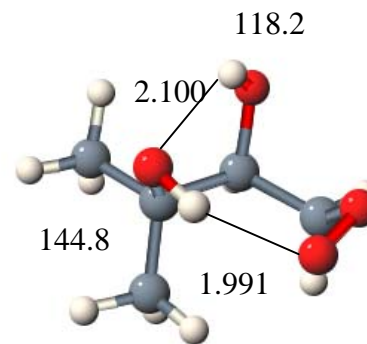

**P2(3→2,2→4\*)**

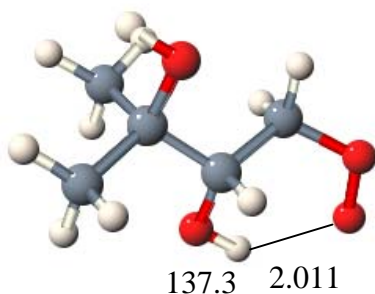

**P2(3→4\*)**

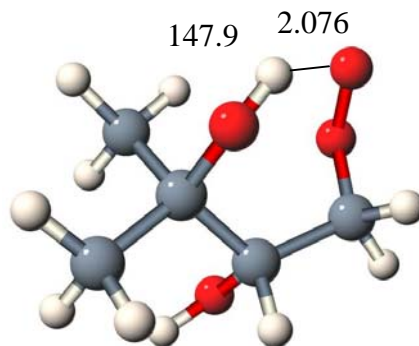

**P2(2→4\*)**

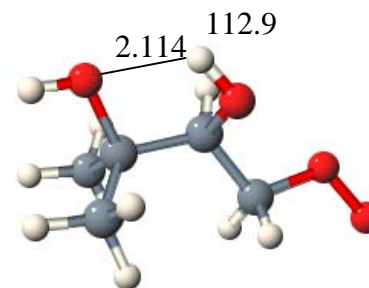

**P2(3→2)**

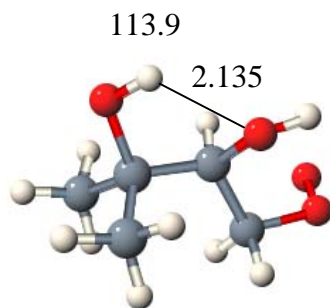

**P2(2→3)**

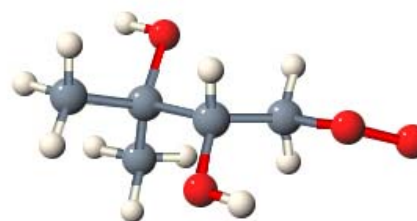

**P2(none)**

Figure S2

Figure S3

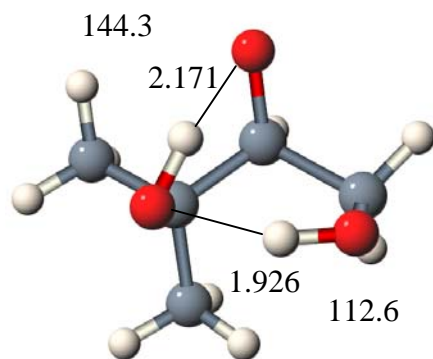

**A1(4→2,2→3\*)**

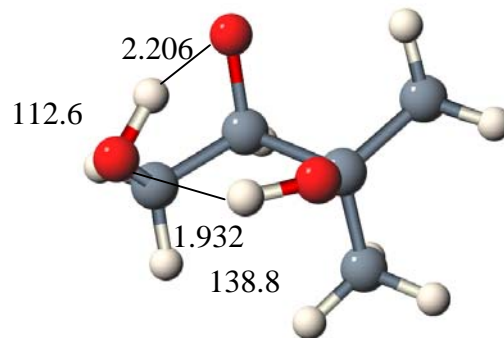

**A1(2→4,4→3\*)**

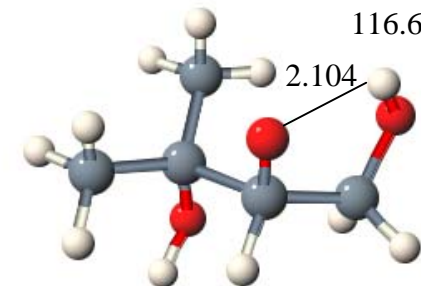

**A1(4→3\*)**

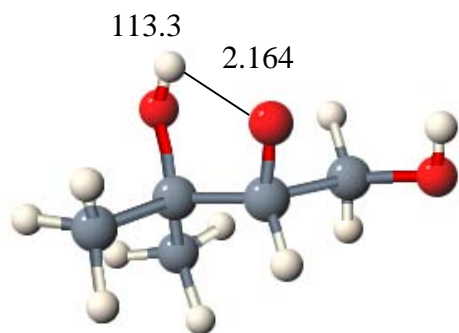

**A1(2→3\*)**

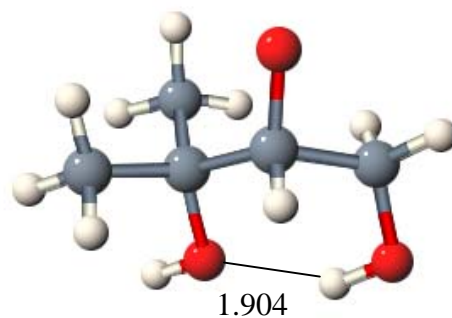

**A1(4→2)**

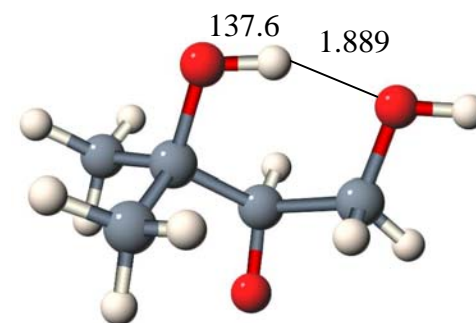

**A1(2→4)**

Figure S4

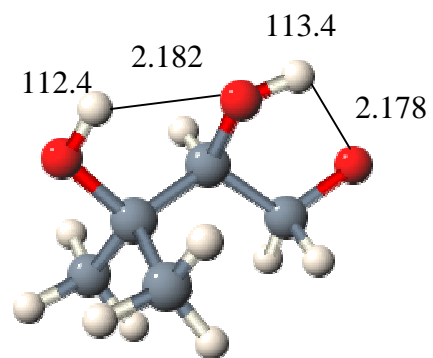

**A2(2→3,3→4\*)**

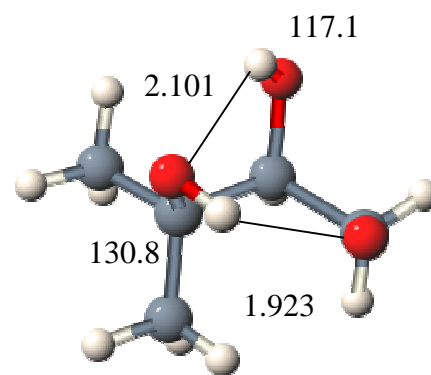

**A2(3→2,2→4\*)**

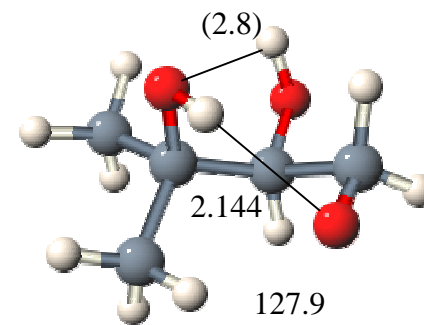

**A2(2→4\*)**

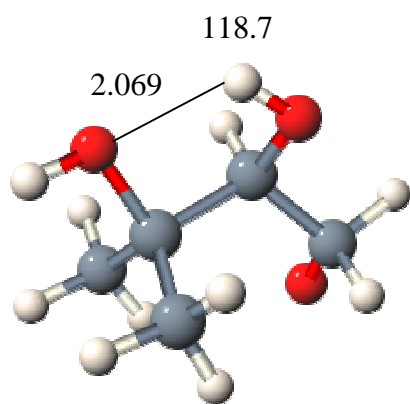

**A2(3→2)**

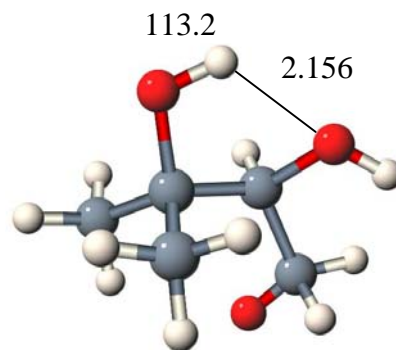

**A2(2→3)**

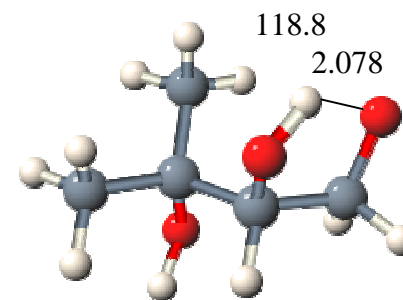

**A2(3→4\*)**



Figure S5

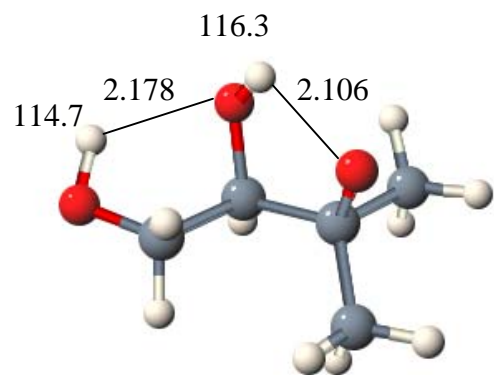

**A3(4→3,3→2\*)**

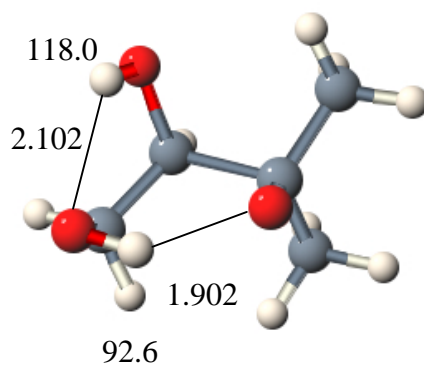

**A3(3→4,4→2\*)**

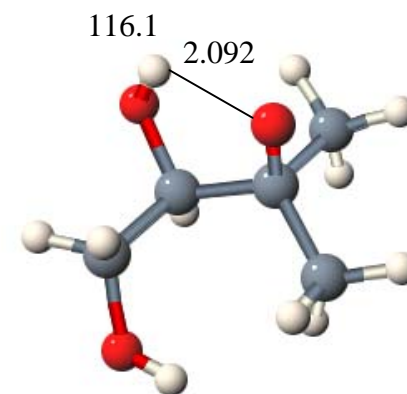

**A3(3→2\*)**

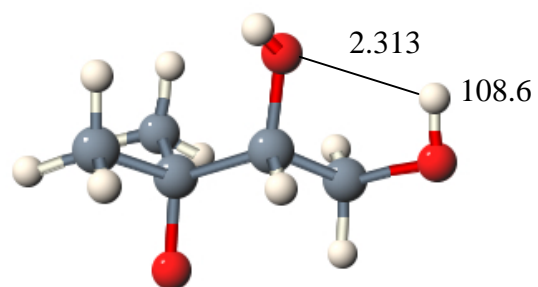

**A3(4→3)**

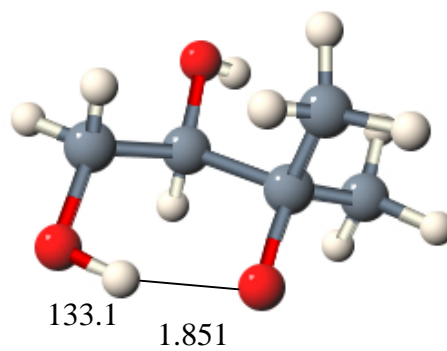

**A3(4→2\*)**

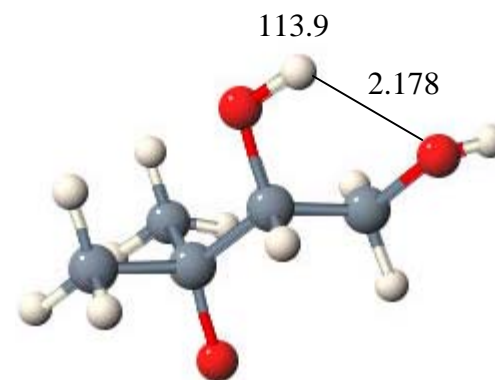

**A3(3→4)**

## Index of Tables of Cartesian Coordinates

### Peroxy 1

**P1**(2→4,4→3\*)

**P1**(4→2,2→3\*)

**P1**(2→3\*)

**P1**(4→3\*)

**P1**(2→4)

**P1**(4→2)

**P1**(none)

### Peroxy 2

**P2**(2→3,3→4\*)

**P2**(2→3,3→4\*')

**P2**(3→2,2→4\*)

**P2**(2→4\*)

**P2**(3→4\*)

**P2**(2→3)

**P2**(3→2)

**P2**(none)

### Alkoxy 1 and related Transition states

**A1**(4→2,2→3\*)      scission 1      scission 2

**A1**(2→4,4→3\*)      scission 1      scission 2

**A1**(2→3\*)      scission 1      scission 2      H-atom transfer

**A1**(4→3\*)      scission 1      scission 2      H-atom transfer

**A1**(2→4)

**A1**(4→2)

### Alkoxy 2

**A2**(3→2,2→4\*)      1,5 H-shift

**A2**(2→3,3→4\*)      scission

**A2**(2→4\*)      H-atom transfer

**A2**(3→4\*)      scission      1,5 H-shift

**A2**(2→3)

**A2**(3→2)

### Alkoxy 3

**A3**(3→4,4→2\*)      scission

**A3**(4→3,3→2\*)      scission

**A3**(3→2\*)

**A3**(4→2\*)

**A3**(3→4)

**A3**(4→3)

**P1**(2→4,4→3\*)

|   |           |           |           |
|---|-----------|-----------|-----------|
| 6 | 1.346923  | 0.248981  | 1.847821  |
| 6 | 0.046852  | 0.107735  | 1.050072  |
| 6 | 0.275292  | -0.791877 | -0.205357 |
| 8 | -0.317582 | 1.422754  | 0.660548  |
| 6 | -1.055906 | -0.519609 | 1.924120  |
| 1 | 2.127465  | 0.699483  | 1.232232  |
| 1 | 1.698084  | -0.720835 | 2.214013  |
| 1 | 1.166248  | 0.901234  | 2.706094  |
| 1 | -0.812226 | -1.545723 | 2.221192  |
| 1 | -2.020055 | -0.528121 | 1.407130  |
| 1 | -1.169541 | 0.081854  | 2.829719  |
| 1 | -1.092227 | 1.330413  | 0.080035  |
| 1 | 0.638119  | -1.772856 | 0.123289  |
| 8 | 1.421732  | -0.284705 | -0.969724 |
| 6 | -0.934018 | -0.996749 | -1.121282 |
| 8 | 1.090553  | 0.621775  | -1.878921 |
| 1 | -0.963312 | 0.718003  | -1.963158 |
| 1 | -0.599965 | -1.528963 | -2.022719 |
| 8 | -1.618622 | 0.204368  | -1.460636 |
| 1 | -1.656100 | -1.638913 | -0.610204 |

**P1(4→2,2→3\*)**

|   |           |           |           |
|---|-----------|-----------|-----------|
| 6 | -0.651666 | -2.065115 | -0.464735 |
| 6 | -0.706301 | -0.529053 | -0.459318 |
| 6 | 0.720492  | 0.081146  | -0.533237 |
| 8 | -1.382027 | -0.068562 | 0.724752  |
| 6 | -1.548818 | -0.027722 | -1.637439 |
| 1 | -0.094975 | -2.449571 | 0.392532  |
| 1 | -0.176664 | -2.442244 | -1.376416 |
| 1 | -1.670834 | -2.457089 | -0.417002 |
| 1 | -1.105261 | -0.314796 | -2.595341 |
| 1 | -1.665843 | 1.058309  | -1.614019 |
| 1 | -2.545353 | -0.471435 | -1.570517 |
| 1 | -0.801714 | -0.327588 | 1.463164  |
| 1 | 1.185613  | -0.208147 | -1.482483 |
| 8 | 1.639780  | -0.529577 | 0.437105  |
| 6 | 0.813052  | 1.611198  | -0.398741 |
| 8 | 1.153154  | -0.589797 | 1.670470  |
| 1 | -0.598876 | 1.719434  | 0.899156  |
| 1 | 1.871444  | 1.890997  | -0.426930 |
| 8 | 0.276482  | 2.129865  | 0.790972  |
| 1 | 0.342798  | 2.043970  | -1.297711 |

**P1(2→3\*)**

|   |           |           |           |
|---|-----------|-----------|-----------|
| 6 | -0.827924 | -2.126025 | -0.038660 |
| 6 | -0.889840 | -0.610700 | 0.196772  |

|   |           |           |           |
|---|-----------|-----------|-----------|
| 6 | 0.529939  | 0.009779  | 0.065970  |
| 8 | -1.321531 | -0.470115 | 1.548089  |
| 6 | -1.902296 | 0.054514  | -0.750262 |
| 1 | -0.027243 | -2.582633 | 0.551154  |
| 1 | -0.685969 | -2.379960 | -1.092367 |
| 1 | -1.775304 | -2.556926 | 0.295203  |
| 1 | -1.628449 | -0.072009 | -1.803431 |
| 1 | -1.985241 | 1.124481  | -0.544186 |
| 1 | -2.883578 | -0.400337 | -0.593107 |
| 1 | -1.081515 | 0.425626  | 1.839502  |
| 1 | 1.141404  | -0.337121 | 0.904142  |
| 8 | 0.461116  | 1.479566  | 0.177620  |
| 6 | 1.271813  | -0.214873 | -1.242260 |
| 8 | 0.092954  | 1.897240  | 1.377519  |
| 1 | 3.058496  | 0.211947  | -1.897890 |
| 1 | 1.209474  | -1.277664 | -1.511423 |
| 8 | 2.615614  | 0.193753  | -1.040516 |
| 1 | 0.782551  | 0.364866  | -2.038642 |

**P1(4→3\*)**

|   |           |           |           |
|---|-----------|-----------|-----------|
| 6 | -1.118534 | -2.034447 | -0.137214 |
| 6 | -1.096525 | -0.498560 | -0.209331 |
| 6 | 0.344818  | 0.046787  | -0.236355 |
| 8 | -1.690336 | 0.062501  | 0.967609  |
| 6 | -1.851426 | -0.020948 | -1.462595 |
| 1 | -0.651906 | -2.387297 | 0.783141  |
| 1 | -0.597205 | -2.483599 | -0.988479 |
| 1 | -2.156278 | -2.386798 | -0.161672 |
| 1 | -1.394521 | -0.404745 | -2.380085 |
| 1 | -1.887669 | 1.069121  | -1.519884 |
| 1 | -2.882664 | -0.389053 | -1.427701 |
| 1 | -2.581834 | -0.301280 | 1.051602  |
| 1 | 0.815587  | -0.180179 | -1.198199 |
| 8 | 1.101483  | -0.714855 | 0.777779  |
| 6 | 0.494282  | 1.544623  | 0.062092  |
| 8 | 2.389416  | -0.414802 | 0.778132  |
| 1 | 2.414461  | 1.499013  | 0.003666  |
| 1 | -0.289995 | 2.097918  | -0.460545 |
| 8 | 1.729140  | 2.060408  | -0.391038 |
| 1 | 0.338705  | 1.696148  | 1.138720  |

**P1(2→4)**

|   |           |           |           |
|---|-----------|-----------|-----------|
| 6 | -0.985726 | -1.719363 | 0.213533  |
| 6 | -1.026797 | -0.200416 | -0.013562 |
| 6 | 0.390841  | 0.411876  | -0.176465 |
| 8 | -1.646754 | 0.456564  | 1.090751  |

|   |           |           |           |
|---|-----------|-----------|-----------|
| 6 | -1.885879 | 0.143946  | -1.233027 |
| 1 | -0.487981 | -1.964852 | 1.156873  |
| 1 | -0.463962 | -2.235181 | -0.599296 |
| 1 | -2.008217 | -2.102058 | 0.269119  |
| 1 | -1.515739 | -0.345474 | -2.136675 |
| 1 | -1.899222 | 1.225431  | -1.396632 |
| 1 | -2.912256 | -0.182782 | -1.045378 |
| 1 | -1.037144 | 0.386411  | 1.843517  |
| 1 | 0.293371  | 1.497714  | -0.254021 |
| 8 | 0.948526  | -0.067751 | -1.445156 |
| 6 | 1.417715  | 0.043913  | 0.897999  |
| 8 | 1.947132  | 0.697817  | -1.861089 |
| 1 | 1.503160  | 0.122218  | 2.857808  |
| 1 | 1.628166  | -1.032590 | 0.843305  |
| 8 | 0.887683  | 0.409065  | 2.172022  |
| 1 | 2.346194  | 0.585878  | 0.678285  |

**P1(4→2)**

|   |           |           |           |
|---|-----------|-----------|-----------|
| 6 | -0.792193 | -1.939051 | -0.273622 |
| 6 | -0.816684 | -0.409531 | -0.382887 |
| 6 | 0.612513  | 0.186615  | -0.323281 |
| 8 | -1.530835 | 0.141738  | 0.742530  |
| 6 | -1.503629 | 0.026390  | -1.687858 |
| 1 | -0.385038 | -2.250358 | 0.689176  |
| 1 | -0.185008 | -2.386219 | -1.065587 |
| 1 | -1.811230 | -2.332209 | -0.367838 |
| 1 | -0.966730 | -0.344451 | -2.566487 |
| 1 | -1.579871 | 1.114078  | -1.757078 |
| 1 | -2.518630 | -0.384538 | -1.724091 |
| 1 | -2.418764 | -0.238986 | 0.757308  |
| 1 | 1.134243  | -0.085343 | -1.245041 |
| 8 | 1.375594  | -0.438811 | 0.761192  |
| 6 | 0.707703  | 1.704048  | -0.104215 |
| 8 | 2.168955  | -1.399251 | 0.311250  |
| 1 | -0.607665 | 1.723582  | 1.296923  |
| 1 | 1.763217  | 1.985928  | -0.178515 |
| 8 | 0.254246  | 2.144948  | 1.151742  |
| 1 | 0.185540  | 2.198687  | -0.941315 |

**P1(none)**

|   |           |           |           |
|---|-----------|-----------|-----------|
| 6 | -0.724727 | -2.139069 | -0.009670 |
| 6 | -0.867039 | -0.609178 | -0.072966 |
| 6 | 0.519934  | 0.064181  | -0.140367 |
| 8 | -1.464986 | -0.122381 | 1.136508  |
| 6 | -1.719632 | -0.202789 | -1.285720 |
| 1 | -0.185109 | -2.442964 | 0.888379  |

|   |           |           |           |
|---|-----------|-----------|-----------|
| 1 | -0.194124 | -2.526477 | -0.885568 |
| 1 | -1.718818 | -2.600746 | 0.004636  |
| 1 | -1.266913 | -0.539396 | -2.223711 |
| 1 | -1.839001 | 0.879352  | -1.334413 |
| 1 | -2.706731 | -0.673261 | -1.205271 |
| 1 | -2.325193 | -0.552498 | 1.230415  |
| 1 | 1.018331  | -0.190590 | -1.079871 |
| 8 | 1.326272  | -0.526860 | 0.939045  |
| 6 | 0.554517  | 1.581409  | 0.055048  |
| 8 | 2.619175  | -0.339600 | 0.734298  |
| 1 | 0.064867  | 3.140858  | -1.006364 |
| 1 | -0.104045 | 1.853173  | 0.888043  |
| 8 | 0.155732  | 2.193739  | -1.168096 |
| 1 | 1.588879  | 1.846045  | 0.311733  |

**P2(2→3,3→4\*)**

|   |           |           |           |
|---|-----------|-----------|-----------|
| 1 | -0.255677 | -1.197470 | -2.138143 |
| 6 | -0.394163 | -0.113702 | -2.175709 |
| 1 | 0.569999  | 0.349522  | -2.415835 |
| 6 | -0.972127 | 0.399254  | -0.846632 |
| 1 | -1.093241 | 0.119987  | -2.982738 |
| 6 | -0.123454 | -0.067087 | 0.368299  |
| 8 | -2.280476 | -0.137200 | -0.652606 |
| 6 | -1.147777 | 1.918615  | -0.862240 |
| 1 | -0.213169 | 2.440946  | -1.087505 |
| 1 | -1.532227 | 2.274471  | 0.098073  |
| 1 | -1.875647 | 2.182552  | -1.634070 |
| 8 | -0.259301 | -1.482320 | 0.425753  |
| 1 | -0.559682 | 0.397518  | 1.266498  |
| 6 | 1.349556  | 0.327321  | 0.300244  |
| 8 | 1.996412  | 0.202426  | 1.610317  |
| 1 | 1.496311  | 1.382171  | 0.060424  |
| 1 | 1.900288  | -0.305551 | -0.400057 |
| 1 | -2.152214 | -1.062986 | -0.393306 |
| 1 | 0.334218  | -1.793149 | 1.128411  |
| 8 | 1.931969  | -1.029709 | 2.090844  |

**P2(2→3,3→4')**

|   |           |           |           |
|---|-----------|-----------|-----------|
| 1 | -0.295462 | -0.971686 | -2.301725 |
| 6 | -0.207485 | 0.117321  | -2.271450 |
| 1 | 0.830587  | 0.396380  | -2.478123 |
| 6 | -0.675717 | 0.677461  | -0.926810 |
| 1 | -0.835587 | 0.519785  | -3.070618 |
| 6 | 0.237257  | 0.233132  | 0.244401  |
| 8 | -1.981383 | 0.138030  | -0.699838 |
| 6 | -0.738235 | 2.212832  | -0.975272 |

|   |           |           |           |
|---|-----------|-----------|-----------|
| 1 | 0.239180  | 2.643528  | -1.218396 |
| 1 | -1.056838 | 2.617421  | -0.011614 |
| 1 | -1.454868 | 2.520350  | -1.741462 |
| 8 | -0.402200 | 0.705163  | 1.430322  |
| 1 | 1.233413  | 0.687187  | 0.134715  |
| 6 | 0.404349  | -1.282819 | 0.322018  |
| 8 | 1.100018  | -1.629927 | 1.561022  |
| 1 | 0.987712  | -1.690418 | -0.503988 |
| 1 | -0.567231 | -1.774155 | 0.400732  |
| 1 | -2.214744 | 0.394036  | 0.206037  |
| 1 | 0.067643  | 0.336851  | 2.191031  |
| 8 | 2.401713  | -1.391621 | 1.463005  |

**P2(3→2,2→4\*)**

|   |           |           |           |
|---|-----------|-----------|-----------|
| 1 | 0.240918  | -0.880457 | -1.986166 |
| 6 | 0.436842  | 0.194767  | -1.973217 |
| 1 | 1.510042  | 0.352975  | -2.128262 |
| 6 | -0.033978 | 0.836154  | -0.663843 |
| 1 | -0.095450 | 0.647581  | -2.814448 |
| 6 | 0.769382  | 0.353922  | 0.585359  |
| 8 | -1.425329 | 0.559141  | -0.427853 |
| 6 | 0.061541  | 2.363259  | -0.747732 |
| 1 | 1.081780  | 2.676886  | -0.989808 |
| 1 | -0.223646 | 2.815818  | 0.204045  |
| 1 | -0.611866 | 2.727795  | -1.527504 |
| 8 | 0.143017  | 0.823826  | 1.761885  |
| 1 | 1.767513  | 0.813173  | 0.535601  |
| 6 | 1.056190  | -1.152011 | 0.720864  |
| 8 | -0.123318 | -1.960958 | 1.031704  |
| 1 | 1.683646  | -1.308075 | 1.601075  |
| 1 | 1.530916  | -1.584563 | -0.162641 |
| 1 | -1.553138 | -0.396982 | -0.538641 |
| 1 | -0.809240 | 0.767618  | 1.568450  |
| 8 | -0.877036 | -2.198048 | -0.027022 |

**P2(2→4\*)**

|   |           |           |           |
|---|-----------|-----------|-----------|
| 1 | -2.164102 | 0.002962  | -2.024739 |
| 6 | -1.100704 | -0.164268 | -2.220085 |
| 1 | -0.959115 | -1.208295 | -2.523165 |
| 6 | -0.269133 | 0.184539  | -0.979336 |
| 1 | -0.803530 | 0.471113  | -3.058073 |
| 6 | -0.710438 | -0.746258 | 0.201187  |
| 8 | -0.627751 | 1.529701  | -0.658345 |
| 6 | 1.228553  | 0.064058  | -1.304070 |
| 1 | 1.498466  | -0.965191 | -1.552471 |
| 1 | 1.856514  | 0.376160  | -0.467867 |

|   |           |           |           |
|---|-----------|-----------|-----------|
| 1 | 1.457914  | 0.703283  | -2.161474 |
| 8 | -0.128657 | -2.043240 | 0.149391  |
| 1 | -1.811654 | -0.816635 | 0.147702  |
| 6 | -0.477616 | -0.206615 | 1.610031  |
| 8 | 0.914201  | 0.104992  | 1.931426  |
| 1 | -0.741217 | -0.982651 | 2.332200  |
| 1 | -1.059604 | 0.698918  | 1.780178  |
| 1 | -0.008192 | 1.835555  | 0.025025  |
| 1 | -0.383680 | -2.453554 | -0.686792 |
| 8 | 1.228986  | 1.352247  | 1.620417  |

**P2(3→4\*)**

|   |           |           |           |
|---|-----------|-----------|-----------|
| 1 | -0.173119 | -1.577822 | -2.393268 |
| 6 | -0.181598 | -0.485912 | -2.460221 |
| 1 | 0.828646  | -0.141449 | -2.691518 |
| 6 | -0.678412 | 0.121644  | -1.142975 |
| 1 | -0.843091 | -0.196452 | -3.285381 |
| 6 | 0.257633  | -0.324589 | 0.007349  |
| 8 | -1.952399 | -0.440009 | -0.788061 |
| 6 | -0.775222 | 1.649478  | -1.246664 |
| 1 | 0.216445  | 2.090372  | -1.371650 |
| 1 | -1.240719 | 2.076692  | -0.353551 |
| 1 | -1.389221 | 1.932108  | -2.109383 |
| 8 | 1.553995  | 0.171854  | -0.268483 |
| 1 | 0.244593  | -1.426850 | 0.018389  |
| 6 | -0.242649 | 0.140090  | 1.375975  |
| 8 | 0.413194  | -0.605133 | 2.450971  |
| 1 | -1.300951 | -0.083907 | 1.510409  |
| 1 | -0.038130 | 1.200537  | 1.543241  |
| 1 | -2.568087 | -0.242909 | -1.506162 |
| 1 | 2.075763  | 0.038636  | 0.539773  |
| 8 | 1.723880  | -0.410864 | 2.467862  |

**P2(2→3)**

|   |           |           |           |
|---|-----------|-----------|-----------|
| 1 | -0.148392 | -1.371481 | -2.184187 |
| 6 | -0.246421 | -0.284158 | -2.245559 |
| 1 | 0.744570  | 0.140415  | -2.441664 |
| 6 | -0.874452 | 0.275982  | -0.958525 |
| 1 | -0.893851 | -0.041233 | -3.091979 |
| 6 | -0.122819 | -0.204029 | 0.309187  |
| 8 | -2.217237 | -0.195562 | -0.835917 |
| 6 | -0.974302 | 1.801863  | -1.004478 |
| 1 | -0.002772 | 2.272828  | -1.180750 |
| 1 | -1.393743 | 2.191162  | -0.072249 |
| 1 | -1.643140 | 2.088349  | -1.820465 |
| 8 | -0.287278 | -1.623550 | 0.353388  |



|   |           |           |           |
|---|-----------|-----------|-----------|
| 1 | -0.610884 | 0.261238  | 1.177192  |
| 6 | 1.358557  | 0.150064  | 0.363839  |
| 8 | 1.925165  | -0.332516 | 1.625020  |
| 1 | 1.539841  | 1.225155  | 0.313696  |
| 1 | 1.931028  | -0.381391 | -0.399060 |
| 1 | -2.145798 | -1.126127 | -0.572703 |
| 1 | 0.017760  | -1.934599 | 1.215895  |
| 8 | 1.549599  | 0.431297  | 2.641195  |

**P2(3→2)**

|   |           |           |           |
|---|-----------|-----------|-----------|
| 1 | -1.455624 | 0.469467  | -1.972861 |
| 6 | -0.383983 | 0.660722  | -2.062008 |
| 1 | 0.107823  | -0.255650 | -2.403516 |
| 6 | 0.177957  | 1.136962  | -0.718142 |
| 1 | -0.221685 | 1.421362  | -2.834973 |
| 6 | -0.234522 | 0.193877  | 0.447396  |
| 8 | -0.465925 | 2.369862  | -0.331577 |
| 6 | 1.692639  | 1.361126  | -0.774063 |
| 1 | 2.236419  | 0.454055  | -1.054944 |
| 1 | 2.064855  | 1.707805  | 0.194121  |
| 1 | 1.929711  | 2.127079  | -1.520539 |
| 8 | -1.641123 | 0.190223  | 0.603705  |
| 1 | 0.255913  | 0.580071  | 1.356464  |
| 6 | 0.201124  | -1.247240 | 0.254727  |
| 8 | 0.117019  | -1.904176 | 1.555418  |
| 1 | 1.236105  | -1.335557 | -0.083697 |
| 1 | -0.466037 | -1.777251 | -0.428694 |
| 1 | -0.453532 | 2.968194  | -1.089985 |
| 1 | -1.897212 | 1.125677  | 0.602049  |
| 8 | 0.483027  | -3.170650 | 1.466093  |

**P2(none)**

|   |           |           |           |
|---|-----------|-----------|-----------|
| 1 | -0.148392 | -1.371481 | -2.184187 |
| 6 | -0.246421 | -0.284158 | -2.245559 |
| 1 | 0.744570  | 0.140415  | -2.441664 |
| 6 | -0.874452 | 0.275982  | -0.958525 |
| 1 | -0.893851 | -0.041233 | -3.091979 |
| 6 | -0.122819 | -0.204029 | 0.309187  |
| 8 | -2.217237 | -0.195562 | -0.835917 |
| 6 | -0.974302 | 1.801863  | -1.004478 |
| 1 | -0.002772 | 2.272828  | -1.180750 |
| 1 | -1.393743 | 2.191162  | -0.072249 |
| 1 | -1.643140 | 2.088349  | -1.820465 |
| 8 | -0.287278 | -1.623550 | 0.353388  |
| 1 | -0.610884 | 0.261238  | 1.177192  |
| 6 | 1.358557  | 0.150064  | 0.363839  |

|   |           |           |           |
|---|-----------|-----------|-----------|
| 8 | 1.925165  | -0.332516 | 1.625020  |
| 1 | 1.539841  | 1.225155  | 0.313696  |
| 1 | 1.931028  | -0.381391 | -0.399060 |
| 1 | -2.145798 | -1.126127 | -0.572703 |
| 1 | 0.017760  | -1.934599 | 1.215895  |
| 8 | 1.549599  | 0.431297  | 2.641195  |

**A1(4→2, 2→3\*)**

|   |           |           |           |
|---|-----------|-----------|-----------|
| 1 | -2.206683 | -0.142747 | -0.076383 |
| 6 | -1.621018 | -0.466312 | -0.940809 |
| 1 | -1.675529 | -1.556505 | -1.015178 |
| 6 | -0.172731 | 0.005123  | -0.836453 |
| 1 | -2.083177 | -0.040507 | -1.836324 |
| 6 | 0.639148  | -0.670764 | 0.326913  |
| 8 | -0.223238 | 1.412847  | -0.550981 |
| 6 | 0.585539  | -0.240336 | -2.149475 |
| 1 | 0.621928  | -1.309584 | -2.383958 |
| 1 | 1.615284  | 0.122572  | -2.069745 |
| 1 | 0.092964  | 0.280649  | -2.974881 |
| 8 | 1.797320  | -0.007847 | 0.537167  |
| 1 | 0.794748  | -1.747840 | 0.129602  |
| 6 | -0.156607 | -0.648912 | 1.711689  |
| 8 | -0.604123 | 0.614994  | 2.081199  |
| 1 | 0.513608  | -1.033862 | 2.487143  |
| 1 | -0.976180 | -1.374705 | 1.575009  |
| 1 | -0.791489 | 1.115023  | 1.264994  |
| 1 | 0.688872  | 1.654748  | -0.310552 |

**A1(4→2,2→3\*) TS for scission 1**

|   |           |           |           |
|---|-----------|-----------|-----------|
| 1 | 0.027638  | -2.148082 | -0.443504 |
| 6 | -0.902804 | -1.601769 | -0.614028 |
| 1 | -1.076526 | -1.536848 | -1.693329 |
| 6 | -0.873306 | -0.208885 | 0.007733  |
| 1 | -1.712911 | -2.192255 | -0.177103 |
| 6 | 0.025340  | 0.835916  | -0.709682 |
| 8 | -0.378113 | -0.327880 | 1.353801  |
| 6 | -2.293477 | 0.391472  | 0.039873  |
| 1 | -2.710207 | 0.480494  | -0.969219 |
| 1 | -2.269602 | 1.387702  | 0.489116  |
| 1 | -2.949091 | -0.252648 | 0.632729  |
| 8 | 0.304038  | 1.869390  | -0.080580 |
| 1 | 0.016314  | 0.817208  | -1.818569 |
| 6 | 1.985230  | -0.234434 | -0.663148 |
| 8 | 2.250482  | -0.396044 | 0.644498  |
| 1 | 2.654066  | 0.466440  | -1.154598 |

|   |           |           |           |
|---|-----------|-----------|-----------|
| 1 | 1.652468  | -1.096462 | -1.242807 |
| 1 | 1.454580  | -0.773500 | 1.079177  |
| 1 | -0.143878 | 0.590418  | 1.591858  |

**A1(4→2,2→3\*)** TS for scission 2

|   |           |           |           |
|---|-----------|-----------|-----------|
| 1 | -0.283899 | -2.197124 | -0.496023 |
| 6 | -1.143072 | -1.544007 | -0.660170 |
| 1 | -1.272604 | -1.379388 | -1.733128 |
| 6 | -0.993921 | -0.234493 | 0.063316  |
| 1 | -2.036986 | -2.065098 | -0.291013 |
| 6 | 0.574478  | 0.778747  | -0.705737 |
| 8 | -0.567129 | -0.427708 | 1.363225  |
| 6 | -2.131183 | 0.752103  | -0.080769 |
| 1 | -2.362281 | 0.936769  | -1.132978 |
| 1 | -1.878369 | 1.704587  | 0.388047  |
| 1 | -3.026873 | 0.339004  | 0.401060  |
| 8 | 0.551600  | 1.758946  | 0.092813  |
| 1 | 0.158022  | 0.894535  | -1.732607 |
| 6 | 1.750471  | -0.217558 | -0.670057 |
| 8 | 2.163251  | -0.609265 | 0.615882  |
| 1 | 2.598459  | 0.312667  | -1.125302 |
| 1 | 1.526650  | -1.074006 | -1.327904 |
| 1 | 1.372165  | -0.907123 | 1.090431  |
| 1 | -0.316698 | 0.450637  | 1.704551  |

**A1(2→4,4→3\*)**

|   |           |           |           |
|---|-----------|-----------|-----------|
| 1 | 1.905599  | 0.701937  | 1.545397  |
| 6 | 1.023092  | 0.205399  | 1.949090  |
| 1 | 1.304676  | -0.791891 | 2.298743  |
| 6 | -0.074693 | 0.131067  | 0.890321  |
| 1 | 0.652723  | 0.780998  | 2.802873  |
| 6 | 0.483357  | -0.774339 | -0.392758 |
| 8 | -0.355141 | 1.437768  | 0.479810  |
| 6 | -1.333919 | -0.564567 | 1.432079  |
| 1 | -1.143080 | -1.607097 | 1.703997  |
| 1 | -2.159568 | -0.532898 | 0.716708  |
| 1 | -1.656508 | -0.025654 | 2.328023  |
| 1 | 0.590659  | -1.785413 | 0.043848  |
| 8 | 1.641473  | -0.231681 | -0.780166 |
| 6 | -0.533785 | -0.756589 | -1.560428 |
| 8 | -0.616007 | 0.555939  | -2.103386 |
| 1 | -1.538763 | -1.049688 | -1.248590 |
| 1 | -0.194776 | -1.475622 | -2.320013 |
| 1 | -0.819789 | 1.399221  | -0.377033 |

1 0.311928 0.844075 -2.173848

**A1(2→4,4→3\*)** TS for scission 1

|   |           |           |           |
|---|-----------|-----------|-----------|
| 1 | 2.017892  | 1.632559  | 0.585814  |
| 6 | 2.217084  | 0.683025  | 0.084881  |
| 1 | 2.600086  | 0.881283  | -0.921145 |
| 6 | 0.926605  | -0.153780 | 0.043411  |
| 1 | 2.979297  | 0.136731  | 0.648184  |
| 6 | -0.121942 | 0.729879  | -0.689567 |
| 8 | 0.567780  | -0.367233 | 1.400737  |
| 6 | 1.178227  | -1.486956 | -0.676201 |
| 1 | 1.402886  | -1.341314 | -1.738899 |
| 1 | 0.316991  | -2.157915 | -0.597205 |
| 1 | 2.030230  | -1.993824 | -0.214929 |
| 1 | -0.036506 | 0.688553  | -1.799385 |
| 8 | -0.613987 | 1.736157  | -0.135138 |
| 6 | -1.915782 | -0.394838 | -0.664015 |
| 8 | -2.230576 | -0.465827 | 0.658971  |
| 1 | -1.728186 | -1.372998 | -1.095770 |
| 1 | -2.470700 | 0.321938  | -1.265346 |
| 1 | -0.330694 | -0.729733 | 1.413941  |
| 1 | -2.272185 | 0.445963  | 0.997128  |

**A1(2→4,4→3\*)** TS for scission 2

|   |           |           |           |
|---|-----------|-----------|-----------|
| 1 | 1.599302  | 1.812492  | 0.690071  |
| 6 | 2.025611  | 0.962295  | 0.156935  |
| 1 | 2.323091  | 1.276921  | -0.846497 |
| 6 | 1.031396  | -0.169049 | 0.109277  |
| 1 | 2.923961  | 0.625353  | 0.691011  |
| 6 | -0.619433 | 0.643596  | -0.793829 |
| 8 | 0.610130  | -0.491932 | 1.364277  |
| 6 | 1.391207  | -1.335144 | -0.791038 |
| 1 | 1.527577  | -1.014390 | -1.827504 |
| 1 | 0.645166  | -2.132363 | -0.759488 |
| 1 | 2.340835  | -1.762554 | -0.442872 |
| 1 | -0.147241 | 0.722364  | -1.792964 |
| 8 | -0.838329 | 1.683543  | -0.110140 |
| 6 | -1.669625 | -0.472125 | -0.639615 |
| 8 | -2.025611 | -0.576662 | 0.734532  |
| 1 | -1.333062 | -1.453141 | -0.982150 |
| 1 | -2.543001 | -0.191737 | -1.250906 |
| 1 | -0.265429 | -0.932324 | 1.321247  |
| 1 | -1.995648 | 0.352349  | 1.040321  |

**A1(2→3\*)**

1 0.723649 2.174067 -1.287378

|   |           |           |           |
|---|-----------|-----------|-----------|
| 6 | 0.619842  | 2.195318  | -0.197646 |
| 1 | 1.623978  | 2.228803  | 0.239283  |
| 6 | -0.170151 | 0.965188  | 0.285777  |
| 1 | 0.086348  | 3.107358  | 0.083499  |
| 6 | 0.537578  | -0.311350 | -0.268447 |
| 8 | -1.488214 | 0.988665  | -0.255500 |
| 6 | -0.307827 | 0.977606  | 1.807552  |
| 1 | 0.662268  | 0.827670  | 2.293383  |
| 1 | -1.000419 | 0.204624  | 2.149234  |
| 1 | -0.704296 | 1.943096  | 2.134286  |
| 1 | 1.601097  | -0.374800 | 0.026246  |
| 8 | 0.375120  | -0.423680 | -1.605300 |
| 6 | -0.100878 | -1.665902 | 0.309475  |
| 8 | 0.556515  | -2.791765 | -0.185748 |
| 1 | -1.169808 | -1.628108 | 0.070886  |
| 1 | 0.039391  | -1.653806 | 1.391645  |
| 1 | 0.494740  | -2.760256 | -1.151029 |
| 1 | -1.375700 | 0.780429  | -1.197944 |

**A1(2→3\*)** TS for scission 1

|   |           |           |           |
|---|-----------|-----------|-----------|
| 1 | -2.029304 | -1.799087 | -0.332582 |
| 6 | -2.175656 | -0.751202 | -0.609626 |
| 1 | -2.180402 | -0.682915 | -1.703071 |
| 6 | -1.061704 | 0.119030  | 0.016703  |
| 1 | -3.147979 | -0.419351 | -0.234717 |
| 6 | 0.271210  | -0.460548 | -0.489523 |
| 8 | -1.086609 | -0.004470 | 1.434121  |
| 6 | -1.264517 | 1.589726  | -0.340229 |
| 1 | -1.117100 | 1.752874  | -1.413209 |
| 1 | -0.574382 | 2.230210  | 0.213891  |
| 1 | -2.282235 | 1.900952  | -0.088054 |
| 1 | 0.530828  | -0.230335 | -1.541374 |
| 8 | 0.708251  | -1.509349 | 0.053184  |
| 6 | 1.811379  | 0.791188  | 0.200484  |
| 8 | 2.877235  | 0.108742  | -0.260413 |
| 1 | 1.504550  | 0.652872  | 1.236373  |
| 1 | 1.743144  | 1.793846  | -0.212496 |
| 1 | 2.737534  | -0.826772 | -0.017642 |
| 1 | -0.659946 | -0.860837 | 1.610902  |

**A1(2→3\*)** TS for scission 2

|   |           |           |           |
|---|-----------|-----------|-----------|
| 1 | -1.687149 | -1.887842 | -0.433689 |
| 6 | -2.032443 | -0.878064 | -0.664317 |
| 1 | -1.984278 | -0.732443 | -1.746525 |
| 6 | -1.196015 | 0.153013  | 0.062693  |
| 1 | -3.078627 | -0.774223 | -0.349058 |

|   |           |           |           |
|---|-----------|-----------|-----------|
| 6 | 0.660223  | -0.421821 | -0.480851 |
| 8 | -1.131423 | 0.007248  | 1.420117  |
| 6 | -1.404029 | 1.591619  | -0.324810 |
| 1 | -1.200990 | 1.743979  | -1.388063 |
| 1 | -0.773218 | 2.256407  | 0.267822  |
| 1 | -2.450699 | 1.871047  | -0.141215 |
| 1 | 0.484452  | -0.384581 | -1.575960 |
| 8 | 0.722688  | -1.551888 | 0.093701  |
| 6 | 1.569484  | 0.687974  | 0.061481  |
| 8 | 2.923092  | 0.307255  | -0.144630 |
| 1 | 1.344051  | 0.844685  | 1.126072  |
| 1 | 1.427501  | 1.628554  | -0.477676 |
| 1 | 3.010220  | -0.574363 | 0.247118  |
| 1 | -0.789437 | -0.888461 | 1.592493  |

**A1(2→3\*)TS for H-atom transfer**

|   |           |           |           |
|---|-----------|-----------|-----------|
| 1 | -1.591949 | -1.792393 | -0.771046 |
| 6 | -2.082478 | -0.820242 | -0.851024 |
| 1 | -2.027769 | -0.455855 | -1.880038 |
| 6 | -1.487703 | 0.153990  | 0.132228  |
| 1 | -3.147186 | -0.963252 | -0.607229 |
| 6 | 0.967794  | -0.578762 | -0.531274 |
| 8 | -1.072208 | -0.269333 | 1.277328  |
| 6 | -1.770962 | 1.619571  | -0.021734 |
| 1 | -1.650544 | 1.949527  | -1.058025 |
| 1 | -1.125303 | 2.205713  | 0.635144  |
| 1 | -2.813514 | 1.829078  | 0.262363  |
| 1 | 0.985602  | -0.894099 | -1.581819 |
| 8 | 0.738189  | -1.471770 | 0.368919  |
| 6 | 1.652490  | 0.714088  | -0.169349 |
| 8 | 3.072028  | 0.517939  | -0.121502 |
| 1 | 1.266509  | 1.075350  | 0.794121  |
| 1 | 1.483660  | 1.478881  | -0.932529 |
| 1 | 3.230293  | -0.173415 | 0.537046  |
| 1 | -0.188717 | -1.006088 | 1.050968  |

**A1(4→3\*)**

|   |           |           |           |
|---|-----------|-----------|-----------|
| 1 | 0.070398  | 1.719378  | -0.973482 |
| 6 | 0.028613  | 1.701504  | 0.116263  |
| 1 | 1.045753  | 1.808368  | 0.499158  |
| 6 | -0.585375 | 0.405074  | 0.623671  |
| 1 | -0.579663 | 2.540781  | 0.467512  |
| 6 | 0.255158  | -0.914268 | 0.027724  |
| 8 | -1.888635 | 0.324688  | 0.102915  |
| 6 | -0.581657 | 0.302027  | 2.147582  |
| 1 | 0.439679  | 0.319986  | 2.531419  |

|   |           |           |           |
|---|-----------|-----------|-----------|
| 1 | -1.048473 | -0.632235 | 2.482673  |
| 1 | -1.144567 | 1.139718  | 2.571412  |
| 1 | -0.318483 | -1.752850 | 0.473522  |
| 8 | 1.498146  | -0.818689 | 0.496972  |
| 6 | 0.205247  | -0.967577 | -1.517902 |
| 8 | 1.197464  | -0.140656 | -2.082918 |
| 1 | -0.773003 | -0.644629 | -1.883588 |
| 1 | 0.348618  | -2.022152 | -1.809661 |
| 1 | 1.945471  | -0.198957 | -1.463778 |
| 1 | -2.373447 | -0.360708 | 0.585039  |

**A1(4→3\*)** TS for scission 1

|   |           |           |           |
|---|-----------|-----------|-----------|
| 1 | -0.250186 | -1.274919 | 1.448340  |
| 6 | 0.613580  | -0.608485 | 1.443535  |
| 1 | 0.372673  | 0.271210  | 2.044775  |
| 6 | 0.952031  | -0.175275 | 0.021315  |
| 1 | 1.463181  | -1.130482 | 1.891903  |
| 6 | -0.116269 | 0.770221  | -0.577063 |
| 8 | 1.053029  | -1.364127 | -0.772972 |
| 6 | 2.282120  | 0.600605  | -0.016301 |
| 1 | 2.218167  | 1.502443  | 0.598238  |
| 1 | 2.531676  | 0.911154  | -1.039203 |
| 1 | 3.090946  | -0.034107 | 0.357962  |
| 1 | -0.059410 | 0.806121  | -1.692107 |
| 8 | -0.594378 | 1.726426  | 0.063452  |
| 6 | -1.881723 | -0.436767 | -0.701377 |
| 8 | -2.409501 | -0.381849 | 0.539024  |
| 1 | -1.539625 | -1.426473 | -0.984539 |
| 1 | -2.327761 | 0.199915  | -1.465251 |
| 1 | -2.459679 | 0.555412  | 0.796504  |
| 1 | 1.468373  | -1.125671 | -1.613315 |

**A1(4→3\*)** TS for scission 2

|   |           |           |           |
|---|-----------|-----------|-----------|
| 1 | -0.144846 | -1.436540 | 1.327815  |
| 6 | 0.714143  | -0.766748 | 1.393988  |
| 1 | 0.458663  | 0.055441  | 2.064052  |
| 6 | 1.089342  | -0.224412 | 0.043589  |
| 1 | 1.565748  | -1.319347 | 1.812669  |
| 6 | -0.601573 | 0.739467  | -0.601224 |
| 8 | 1.286772  | -1.239858 | -0.858935 |
| 6 | 2.102804  | 0.892354  | -0.001764 |
| 1 | 1.733582  | 1.753238  | 0.557518  |
| 1 | 2.299518  | 1.215722  | -1.031168 |
| 1 | 3.052391  | 0.557773  | 0.436548  |
| 1 | -0.103797 | 1.028654  | -1.550621 |
| 8 | -0.803612 | 1.615152  | 0.286720  |

|   |           |           |           |
|---|-----------|-----------|-----------|
| 6 | -1.648188 | -0.371516 | -0.746362 |
| 8 | -2.325094 | -0.565440 | 0.472536  |
| 1 | -1.195892 | -1.313983 | -1.070728 |
| 1 | -2.337718 | -0.044121 | -1.547683 |
| 1 | -2.232635 | 0.292416  | 0.927609  |
| 1 | 1.701296  | -0.882958 | -1.657936 |

**A1(4→3\*)** TS for H-atom transfer

|   |           |           |           |
|---|-----------|-----------|-----------|
| 1 | -0.125019 | -1.138271 | 1.647473  |
| 6 | 0.686696  | -0.419775 | 1.510043  |
| 1 | 0.420243  | 0.497246  | 2.038601  |
| 6 | 0.943110  | -0.126586 | 0.036994  |
| 1 | 1.594181  | -0.839916 | 1.952636  |
| 6 | -0.407206 | 0.379219  | -0.684654 |
| 8 | 1.343918  | -1.343372 | -0.571534 |
| 6 | 2.005499  | 0.960123  | -0.151142 |
| 1 | 1.664224  | 1.907260  | 0.271631  |
| 1 | 2.212936  | 1.124508  | -1.215973 |
| 1 | 2.936828  | 0.658766  | 0.338207  |
| 1 | -0.117359 | 0.585344  | -1.728539 |
| 8 | -0.919739 | 1.483990  | -0.074035 |
| 6 | -1.542979 | -0.697445 | -0.546931 |
| 8 | -2.339089 | -0.228172 | 0.470993  |
| 1 | -1.198498 | -1.723678 | -0.383577 |
| 1 | -2.091563 | -0.685078 | -1.511645 |
| 1 | -1.825162 | 0.879842  | 0.433026  |
| 1 | 1.737748  | -1.138806 | -1.431092 |

**A1(2→4)**

|   |           |           |           |
|---|-----------|-----------|-----------|
| 1 | -0.641962 | 1.974316  | 0.101279  |
| 6 | -0.256769 | 1.452700  | 0.981864  |
| 1 | 0.769421  | 1.781088  | 1.166468  |
| 6 | -0.314216 | -0.065780 | 0.798525  |
| 1 | -0.882492 | 1.731570  | 1.835386  |
| 6 | 0.749130  | -0.517422 | -0.411684 |
| 8 | -1.585158 | -0.504225 | 0.414390  |
| 6 | 0.061626  | -0.819640 | 2.067350  |
| 1 | 1.044450  | -0.512827 | 2.427934  |
| 1 | 0.075777  | -1.896774 | 1.881393  |
| 1 | -0.691569 | -0.615970 | 2.834764  |
| 1 | 0.472894  | -1.579658 | -0.542789 |
| 8 | 1.977854  | -0.325925 | 0.065583  |
| 6 | 0.510610  | 0.286213  | -1.705123 |
| 8 | -0.873810 | 0.241540  | -2.070433 |
| 1 | 1.130794  | -0.155104 | -2.497371 |
| 1 | 0.853561  | 1.315052  | -1.539764 |



|   |           |           |           |
|---|-----------|-----------|-----------|
| 1 | -1.001945 | 0.751608  | -2.879221 |
| 1 | -1.782303 | -0.100844 | -0.449990 |

**A1(4→2)**

|   |           |           |           |
|---|-----------|-----------|-----------|
| 1 | 0.670330  | 1.882655  | -0.930840 |
| 6 | 0.624849  | 1.785494  | 0.157330  |
| 1 | 1.643165  | 1.687968  | 0.539749  |
| 6 | -0.213309 | 0.575055  | 0.573278  |
| 1 | 0.191127  | 2.708313  | 0.559561  |
| 6 | 0.451138  | -0.770201 | 0.142897  |
| 8 | -1.496991 | 0.596469  | -0.093576 |
| 6 | -0.429151 | 0.547933  | 2.090197  |
| 1 | 0.529535  | 0.459287  | 2.609996  |
| 1 | -1.058367 | -0.301681 | 2.371323  |
| 1 | -0.918132 | 1.468003  | 2.431847  |
| 1 | -0.171540 | -1.618474 | 0.485956  |
| 8 | 1.733730  | -0.873942 | 0.521619  |
| 6 | 0.444557  | -0.969663 | -1.462123 |
| 8 | -0.833014 | -1.260109 | -1.929938 |
| 1 | 1.095464  | -1.817502 | -1.680782 |
| 1 | 0.875035  | -0.061210 | -1.902090 |
| 1 | -1.405357 | -0.534934 | -1.622567 |
| 1 | -1.949573 | 1.416527  | 0.143538  |

**A2(3→2,2→4\*)**

|   |           |           |           |
|---|-----------|-----------|-----------|
| 1 | 0.338523  | 1.969535  | -0.953982 |
| 6 | 0.454394  | 1.868581  | 0.128326  |
| 1 | 1.515316  | 1.975142  | 0.378761  |
| 6 | -0.100736 | 0.528026  | 0.616954  |
| 1 | -0.092178 | 2.685433  | 0.607610  |
| 6 | 0.667232  | -0.698727 | 0.048954  |
| 8 | -1.467448 | 0.363881  | 0.217288  |
| 6 | -0.097120 | 0.460651  | 2.149731  |
| 1 | 0.913379  | 0.611702  | 2.540932  |
| 1 | -0.462398 | -0.508955 | 2.493624  |
| 1 | -0.747218 | 1.243454  | 2.548550  |
| 8 | 0.010743  | -1.879045 | 0.362290  |
| 1 | 1.692547  | -0.767845 | 0.430002  |
| 6 | 0.855414  | -0.567848 | -1.570396 |
| 8 | -0.329049 | -0.260083 | -2.110965 |
| 1 | 1.242559  | -1.558680 | -1.859356 |
| 1 | 1.630065  | 0.210148  | -1.698569 |
| 1 | -1.481862 | 0.466517  | -0.753699 |
| 1 | -0.937795 | -1.668570 | 0.275822  |

**A2(3→2,2→4\*) TS for 1,5 H-shift**

|   |           |           |           |
|---|-----------|-----------|-----------|
| 1 | 1.026606  | -1.567300 | -0.087713 |
| 6 | -0.225020 | -1.673214 | -0.475297 |
| 1 | -0.187140 | -1.839712 | -1.554017 |
| 6 | -0.710441 | -0.312442 | -0.029021 |
| 1 | -0.639594 | -2.513575 | 0.082898  |
| 6 | 0.238652  | 0.803377  | -0.568725 |
| 8 | -0.658170 | -0.233894 | 1.406657  |
| 6 | -2.164041 | -0.042886 | -0.427712 |
| 1 | -2.295905 | -0.137469 | -1.509304 |
| 1 | -2.436952 | 0.973145  | -0.130831 |
| 1 | -2.826178 | -0.752021 | 0.074961  |
| 8 | -0.026062 | 2.013804  | 0.107795  |
| 1 | 0.038047  | 0.991275  | -1.630030 |
| 6 | 1.732878  | 0.336185  | -0.427031 |
| 8 | 1.888064  | -0.828810 | 0.362049  |
| 1 | 2.278445  | 1.142014  | 0.076686  |
| 1 | 2.174302  | 0.189138  | -1.424324 |
| 1 | 0.248807  | -0.504488 | 1.638596  |
| 1 | -0.243257 | 1.744076  | 1.017794  |

**A2(2→3,3→4\*)**

|   |           |           |           |
|---|-----------|-----------|-----------|
| 1 | 0.051550  | 1.932173  | -1.134849 |
| 6 | -0.069915 | 1.906864  | -0.048509 |
| 1 | 0.909566  | 2.076592  | 0.413102  |
| 6 | -0.703083 | 0.576818  | 0.391778  |
| 1 | -0.727401 | 2.728117  | 0.248153  |
| 6 | 0.047535  | -0.645018 | -0.186693 |
| 8 | -2.044788 | 0.502019  | -0.099705 |
| 6 | -0.815676 | 0.490359  | 1.914384  |
| 1 | 0.157871  | 0.599839  | 2.401849  |
| 1 | -1.258319 | -0.463523 | 2.215701  |
| 1 | -1.468148 | 1.291641  | 2.271810  |
| 8 | -0.069547 | -0.577202 | -1.600127 |
| 1 | -0.460623 | -1.546948 | 0.191409  |
| 6 | 1.544642  | -0.762779 | 0.175211  |
| 8 | 2.166173  | -1.726116 | -0.576303 |
| 1 | 1.731418  | -0.887768 | 1.254352  |
| 1 | 2.051311  | 0.179050  | -0.125372 |
| 1 | -1.972632 | 0.340000  | -1.052553 |
| 1 | 0.549678  | -1.236248 | -1.951542 |

**A2(2→3,3→4\*) TS for scission**

|   |          |           |          |
|---|----------|-----------|----------|
| 1 | 0.999088 | -1.109959 | 1.791278 |
| 6 | 1.268992 | -0.095198 | 1.486083 |
| 1 | 0.657942 | 0.602770  | 2.066782 |

|   |           |           |           |
|---|-----------|-----------|-----------|
| 6 | 1.063330  | 0.094667  | -0.020723 |
| 1 | 2.320319  | 0.078801  | 1.729703  |
| 6 | -0.334968 | -0.283105 | -0.470905 |
| 8 | 1.962589  | -0.766787 | -0.752072 |
| 6 | 1.411556  | 1.511898  | -0.471632 |
| 1 | 0.797704  | 2.255389  | 0.044341  |
| 1 | 1.265789  | 1.619302  | -1.550334 |
| 1 | 2.462737  | 1.713712  | -0.250466 |
| 8 | -0.747991 | -1.494002 | -0.023722 |
| 1 | -0.578056 | -0.045816 | -1.509970 |
| 6 | -1.956515 | 0.869308  | 0.245752  |
| 8 | -2.883691 | 0.119023  | -0.132176 |
| 1 | -1.743863 | 1.821616  | -0.274863 |
| 1 | -1.572750 | 0.821381  | 1.282534  |
| 1 | 1.744777  | -1.677530 | -0.505161 |
| 1 | -1.715313 | -1.530959 | -0.171545 |

**A2(2→4\*)**

|   |           |           |           |
|---|-----------|-----------|-----------|
| 1 | 0.136212  | 2.189097  | -1.600069 |
| 6 | 0.311192  | 2.139066  | -0.521420 |
| 1 | 1.382122  | 2.252728  | -0.331430 |
| 6 | -0.194682 | 0.802703  | 0.029610  |
| 1 | -0.224032 | 2.968010  | -0.050476 |
| 6 | 0.660427  | -0.349736 | -0.590994 |
| 8 | -1.546086 | 0.677725  | -0.405559 |
| 6 | -0.128599 | 0.785984  | 1.564865  |
| 1 | 0.874632  | 1.020702  | 1.934989  |
| 1 | -0.435836 | -0.188283 | 1.963212  |
| 1 | -0.816470 | 1.541211  | 1.953741  |
| 8 | 1.882922  | -0.567927 | 0.050868  |
| 1 | 0.906951  | -0.115716 | -1.631906 |
| 6 | -0.196348 | -1.721168 | -0.716437 |
| 8 | -0.839828 | -1.946584 | 0.443267  |
| 1 | 0.552907  | -2.486050 | -0.976235 |
| 1 | -0.878852 | -1.524893 | -1.560041 |
| 1 | -1.891228 | -0.127109 | 0.016999  |
| 1 | 1.705587  | -0.776504 | 0.978875  |

|   | <b>A2(2→4*)</b> | <b>H-atom transfer</b> |           |
|---|-----------------|------------------------|-----------|
| 1 | -1.827607       | -0.217791              | -1.858223 |
| 6 | -2.014008       | -0.107996              | -0.787095 |
| 1 | -2.384917       | 0.901014               | -0.589083 |
| 6 | -0.716629       | -0.360101              | 0.004105  |
| 1 | -2.774521       | -0.836191              | -0.492444 |
| 6 | 0.333513        | 0.756868               | -0.442647 |
| 8 | -0.172373       | -1.568629              | -0.399441 |

|   |           |           |           |
|---|-----------|-----------|-----------|
| 6 | -0.971075 | -0.328294 | 1.520860  |
| 1 | -1.381380 | 0.633582  | 1.849960  |
| 1 | -0.058492 | -0.538192 | 2.086156  |
| 1 | -1.701193 | -1.100863 | 1.776420  |
| 8 | -0.040954 | 2.058449  | -0.109541 |
| 1 | 0.392315  | 0.715670  | -1.533637 |
| 6 | 1.736093  | 0.359919  | 0.140246  |
| 8 | 2.013762  | -0.950815 | -0.171337 |
| 1 | 1.731753  | 0.561864  | 1.227638  |
| 1 | 2.466007  | 1.030155  | -0.337371 |
| 1 | 0.976864  | -1.522229 | -0.155184 |
| 1 | -0.049677 | 2.138571  | 0.855504  |

**A2(3→4\*)**

|   |           |           |           |
|---|-----------|-----------|-----------|
| 1 | -1.420640 | 1.431775  | -0.220339 |
| 6 | -0.692808 | 1.430472  | 0.596858  |
| 1 | 0.132378  | 2.095272  | 0.329886  |
| 6 | -0.176027 | 0.021220  | 0.881593  |
| 1 | -1.188894 | 1.827703  | 1.486729  |
| 6 | 0.526282  | -0.605075 | -0.361726 |
| 8 | -1.337737 | -0.770408 | 1.183550  |
| 6 | 0.793567  | 0.021517  | 2.068294  |
| 1 | 1.693289  | 0.593515  | 1.831265  |
| 1 | 1.107812  | -1.001521 | 2.312991  |
| 1 | 0.312629  | 0.452713  | 2.951128  |
| 1 | 0.823042  | -1.626927 | -0.083222 |
| 8 | 1.699254  | 0.092593  | -0.726706 |
| 6 | -0.418470 | -0.683512 | -1.585068 |
| 8 | -0.438882 | 0.483409  | -2.303756 |
| 1 | -1.424208 | -1.043910 | -1.324707 |
| 1 | 0.011324  | -1.422687 | -2.295664 |
| 1 | 1.410703  | 0.740181  | -1.392646 |
| 1 | -1.033772 | -1.598597 | 1.580161  |

**A2(3→4\*) TS for scission**

|   |           |           |           |
|---|-----------|-----------|-----------|
| 1 | -0.322163 | -1.074912 | 1.550278  |
| 6 | 0.619218  | -0.529382 | 1.469818  |
| 1 | 0.547252  | 0.376792  | 2.078503  |
| 6 | 0.927930  | -0.177351 | 0.014355  |
| 1 | 1.430014  | -1.145090 | 1.867049  |
| 6 | -0.169683 | 0.652310  | -0.655373 |
| 8 | 1.067939  | -1.420907 | -0.682505 |
| 6 | 2.242588  | 0.626997  | -0.082045 |
| 1 | 2.149483  | 1.590539  | 0.426141  |
| 1 | 2.506356  | 0.824264  | -1.128386 |
| 1 | 3.055975  | 0.056680  | 0.376803  |

|   |           |           |           |
|---|-----------|-----------|-----------|
| 1 | -0.022718 | 0.829268  | -1.724558 |
| 8 | -0.659717 | 1.749694  | -0.030086 |
| 6 | -1.965535 | -0.586302 | -0.592536 |
| 8 | -2.371739 | -0.331354 | 0.556853  |
| 1 | -1.440792 | -1.527024 | -0.827902 |
| 1 | -2.362310 | -0.034666 | -1.467399 |
| 1 | -1.190055 | 1.441937  | 0.730129  |
| 1 | 1.429989  | -1.234884 | -1.560070 |

**A2(3→4\*)** TS for 1,5 H-shift

|   |           |           |           |
|---|-----------|-----------|-----------|
| 1 | -0.927928 | -0.916113 | 1.125167  |
| 6 | 0.360709  | -0.760499 | 1.320361  |
| 1 | 0.393525  | -0.080088 | 2.171190  |
| 6 | 0.839419  | -0.172190 | 0.008336  |
| 1 | 0.760860  | -1.751177 | 1.535458  |
| 6 | -0.345127 | 0.609284  | -0.656979 |
| 8 | 1.184115  | -1.287346 | -0.823621 |
| 6 | 2.052305  | 0.751895  | 0.204863  |
| 1 | 1.776122  | 1.627883  | 0.794641  |
| 1 | 2.418085  | 1.104151  | -0.767976 |
| 1 | 2.863547  | 0.214132  | 0.702829  |
| 1 | -0.034280 | 0.942036  | -1.656822 |
| 8 | -0.686584 | 1.762371  | 0.088705  |
| 6 | -1.557116 | -0.334105 | -0.739384 |
| 8 | -1.983010 | -0.621997 | 0.574170  |
| 1 | -1.308432 | -1.238090 | -1.309165 |
| 1 | -2.384759 | 0.191414  | -1.235602 |
| 1 | -1.330261 | 1.452082  | 0.747843  |
| 1 | 1.556213  | -0.936763 | -1.644771 |

**A2(2→3)**

|   |           |           |           |
|---|-----------|-----------|-----------|
| 1 | 0.293453  | 1.909804  | -1.156791 |
| 6 | 0.059987  | 1.810595  | -0.093902 |
| 1 | 0.986904  | 1.901381  | 0.480142  |
| 6 | -0.644048 | 0.475517  | 0.174708  |
| 1 | -0.585799 | 2.645515  | 0.203335  |
| 6 | 0.109732  | -0.722234 | -0.463022 |
| 8 | -1.900178 | 0.445197  | -0.543931 |
| 6 | -0.904847 | 0.257282  | 1.666522  |
| 1 | 0.028045  | 0.172116  | 2.230099  |
| 1 | -1.481172 | -0.659224 | 1.819413  |
| 1 | -1.478682 | 1.096191  | 2.077864  |
| 8 | 0.117856  | -0.601519 | -1.876404 |
| 1 | -0.417646 | -1.637538 | -0.149290 |
| 6 | 1.584381  | -0.858660 | -0.059638 |
| 8 | 1.833380  | -1.147705 | 1.249326  |

|   |           |           |           |
|---|-----------|-----------|-----------|
| 1 | 2.181025  | 0.005034  | -0.408541 |
| 1 | 2.003931  | -1.708820 | -0.640747 |
| 1 | -2.389088 | 1.250023  | -0.327953 |
| 1 | -0.780659 | -0.317265 | -2.107464 |

**A2(3→2)**

|   |           |           |           |
|---|-----------|-----------|-----------|
| 1 | 0.236595  | 1.808403  | -1.329192 |
| 6 | 0.028446  | 1.801906  | -0.256430 |
| 1 | 0.967862  | 1.947356  | 0.283721  |
| 6 | -0.643766 | 0.489630  | 0.148505  |
| 1 | -0.635993 | 2.638015  | -0.024507 |
| 6 | 0.113632  | -0.754663 | -0.398542 |
| 8 | -1.921075 | 0.501558  | -0.538387 |
| 6 | -0.866628 | 0.406672  | 1.658312  |
| 1 | 0.082561  | 0.370199  | 2.198994  |
| 1 | -1.421669 | -0.502074 | 1.922011  |
| 1 | -1.439125 | 1.273380  | 2.001823  |
| 8 | 0.058953  | -0.770181 | -1.813948 |
| 1 | -0.379301 | -1.649326 | 0.024568  |
| 6 | 1.604457  | -0.837031 | -0.037918 |
| 8 | 1.896338  | -1.003255 | 1.283388  |
| 1 | 2.175078  | -0.002466 | -0.485811 |
| 1 | 2.016110  | -1.734857 | -0.549304 |
| 1 | -2.470568 | -0.191213 | -0.143984 |
| 1 | -0.822128 | -0.421472 | -2.030312 |

**A3(3→4,4→2\*)**

|   |           |           |           |
|---|-----------|-----------|-----------|
| 1 | 0.875525  | 1.979380  | -1.229503 |
| 6 | 0.743380  | 2.065844  | -0.151281 |
| 1 | 1.728133  | 2.108946  | 0.324982  |
| 6 | -0.088199 | 0.881103  | 0.377133  |
| 1 | 0.214356  | 2.997767  | 0.070801  |
| 6 | 0.759414  | -0.516881 | -0.000470 |
| 8 | -1.253977 | 0.726533  | -0.271556 |
| 6 | -0.248658 | 0.930307  | 1.911418  |
| 1 | 0.718868  | 0.900846  | 2.423021  |
| 1 | -0.871208 | 0.109993  | 2.275620  |
| 1 | -0.744062 | 1.867447  | 2.182820  |
| 1 | 1.611595  | -0.481100 | 0.687823  |
| 8 | 1.241691  | -0.488023 | -1.296992 |
| 6 | -0.125392 | -1.752499 | 0.200562  |
| 8 | -1.055391 | -1.841176 | -0.866296 |
| 1 | -0.615745 | -1.747044 | 1.180599  |
| 1 | 0.507482  | -2.644200 | 0.138663  |
| 1 | -1.645144 | -1.070190 | -0.756645 |

1 0.518348 -0.847766 -1.843603

**A3(3→4,4→2\*)** TS for scission

1 1.493068 1.897348 0.675505  
6 1.993825 1.037976 0.228371  
1 2.369631 1.308860 -0.762923  
6 1.073807 -0.188042 0.207104  
1 2.858350 0.783702 0.854819  
6 -0.557188 0.471913 -0.814540  
8 0.497837 -0.504027 1.303762  
6 1.558869 -1.316709 -0.708504  
1 1.876572 -0.953054 -1.690204  
1 0.797153 -2.088567 -0.832357  
1 2.424621 -1.787261 -0.227913  
1 -0.134599 0.585255 -1.813664  
8 -0.896186 1.659341 -0.264404  
6 -1.621423 -0.594611 -0.596027  
8 -2.085733 -0.517652 0.738438  
1 -1.260809 -1.594630 -0.862891  
1 -2.479953 -0.368637 -1.244254  
1 -1.304418 -0.770093 1.277220  
1 -1.454296 1.422620 0.505863

**A3(4→3,3→2\*)**

1 0.896454 2.109187 -1.143950  
6 0.566004 2.197158 -0.109245  
1 1.436851 2.251020 0.550391  
6 -0.265085 0.930954 0.297545  
1 -0.038034 3.097625 0.016456  
6 0.534869 -0.342346 -0.124656  
8 -1.393767 1.017611 -0.484392  
6 -0.605331 0.987012 1.795624  
1 0.296095 0.866940 2.405628  
1 -1.313190 0.199128 2.064358  
1 -1.064331 1.949329 2.036805  
1 1.559120 -0.295286 0.262332  
8 0.638093 -0.378077 -1.544634  
6 -0.123269 -1.649087 0.343727  
8 0.552395 -2.757784 -0.208173  
1 -1.188686 -1.626398 0.047935  
1 -0.080259 -1.751710 1.432347  
1 0.713786 -2.516082 -1.134273  
1 -0.234698 -0.079905 -1.858415

**A3(4→3,3→2\*)** TS for scission

1 -1.697845 -1.862319 -0.522909

|   |           |           |           |
|---|-----------|-----------|-----------|
| 6 | -2.056454 | -0.845838 | -0.689290 |
| 1 | -2.013081 | -0.610451 | -1.756409 |
| 6 | -1.261842 | 0.153130  | 0.163285  |
| 1 | -3.104891 | -0.792821 | -0.372715 |
| 6 | 0.604501  | -0.335345 | -0.463360 |
| 8 | -1.055363 | -0.131169 | 1.387398  |
| 6 | -1.456384 | 1.617481  | -0.227520 |
| 1 | -1.197265 | 1.810775  | -1.273159 |
| 1 | -0.876403 | 2.270236  | 0.427446  |
| 1 | -2.516077 | 1.872543  | -0.100192 |
| 1 | 0.561530  | -0.380432 | -1.553101 |
| 8 | 0.755495  | -1.584544 | 0.073270  |
| 6 | 1.529113  | 0.716544  | 0.112493  |
| 8 | 2.870685  | 0.392030  | -0.232053 |
| 1 | 1.376477  | 0.776005  | 1.199265  |
| 1 | 1.328332  | 1.697635  | -0.322242 |
| 1 | 3.029390  | -0.506650 | 0.091269  |
| 1 | 0.389685  | -1.520893 | 0.980178  |

**A3(3→2\*)**

|   |           |           |           |
|---|-----------|-----------|-----------|
| 1 | 1.021036  | 1.946803  | -1.417298 |
| 6 | 0.633791  | 2.079324  | -0.407510 |
| 1 | 1.465660  | 2.155394  | 0.298815  |
| 6 | -0.222712 | 0.829234  | -0.002480 |
| 1 | 0.028178  | 2.985923  | -0.351526 |
| 6 | 0.604505  | -0.456603 | -0.359396 |
| 8 | -1.315743 | 0.897910  | -0.833766 |
| 6 | -0.644503 | 0.948918  | 1.472256  |
| 1 | 0.203224  | 0.768086  | 2.140133  |
| 1 | -1.441637 | 0.235254  | 1.703984  |
| 1 | -1.042360 | 1.947983  | 1.669234  |
| 1 | 1.609018  | -0.374672 | 0.071885  |
| 8 | 0.744722  | -0.515393 | -1.767186 |
| 6 | -0.014331 | -1.775850 | 0.145733  |
| 8 | 0.220167  | -2.034444 | 1.523841  |
| 1 | 0.476752  | -2.579308 | -0.409681 |
| 1 | -1.086061 | -1.806673 | -0.106731 |
| 1 | -0.444495 | -1.566807 | 2.041625  |
| 1 | -0.122990 | -0.246708 | -2.115170 |

**A3(4→2\*)**

|   |           |          |           |
|---|-----------|----------|-----------|
| 1 | 0.403713  | 1.846507 | -1.135724 |
| 6 | 0.378920  | 1.829969 | -0.043687 |
| 1 | 1.402908  | 1.810152 | 0.338341  |
| 6 | -0.422205 | 0.619823 | 0.469921  |
| 1 | -0.104471 | 2.752204 | 0.292995  |



|   |           |           |           |
|---|-----------|-----------|-----------|
| 6 | 0.418283  | -0.766465 | 0.160529  |
| 8 | -1.588552 | 0.432344  | -0.185458 |
| 6 | -0.632983 | 0.678939  | 1.997766  |
| 1 | 0.319249  | 0.779358  | 2.528625  |
| 1 | -1.157740 | -0.214876 | 2.348031  |
| 1 | -1.247388 | 1.549186  | 2.245018  |
| 1 | -0.202080 | -1.572074 | 0.570584  |
| 8 | 1.679839  | -0.700569 | 0.767187  |
| 6 | 0.603214  | -0.992162 | -1.343141 |
| 8 | -0.625958 | -1.193799 | -1.995981 |
| 1 | 1.191529  | -1.908061 | -1.464147 |
| 1 | 1.191267  | -0.168024 | -1.773746 |
| 1 | -1.191751 | -0.429195 | -1.775310 |
| 1 | 1.600750  | -0.969603 | 1.691011  |

**A3(3→4)**

|   |           |           |           |
|---|-----------|-----------|-----------|
| 1 | 0.385562  | 2.041715  | -1.072498 |
| 6 | 0.219455  | 1.979442  | 0.006674  |
| 1 | 1.189914  | 1.923648  | 0.504538  |
| 6 | -0.629780 | 0.741049  | 0.358959  |
| 1 | -0.302479 | 2.887328  | 0.318581  |
| 6 | 0.104143  | -0.602871 | 0.103006  |
| 8 | -1.832663 | 0.753081  | -0.308083 |
| 6 | -1.036329 | 0.798870  | 1.867415  |
| 1 | -0.120653 | 0.713580  | 2.457015  |
| 1 | -1.701908 | -0.031660 | 2.113220  |
| 1 | -1.540360 | 1.742250  | 2.084635  |
| 1 | -0.565761 | -1.406559 | 0.449581  |
| 8 | 1.318270  | -0.609506 | 0.838784  |
| 6 | 0.389098  | -0.859344 | -1.374196 |
| 8 | 1.092087  | -2.104831 | -1.418468 |
| 1 | 1.008177  | -0.050980 | -1.786614 |
| 1 | -0.555879 | -0.903406 | -1.932245 |
| 1 | 1.479087  | -2.208219 | -2.295998 |
| 1 | 1.823224  | -1.360531 | 0.490778  |

**A3(4→3)**

|   |           |           |           |
|---|-----------|-----------|-----------|
| 1 | 0.183647  | 2.024285  | -1.196725 |
| 6 | 0.171244  | 1.987930  | -0.104401 |
| 1 | 1.203891  | 1.966366  | 0.253237  |
| 6 | -0.604537 | 0.751770  | 0.385916  |
| 1 | -0.314505 | 2.899340  | 0.254758  |
| 6 | 0.130784  | -0.600287 | 0.089943  |
| 8 | -1.871143 | 0.682674  | -0.140703 |
| 6 | -0.840624 | 0.847195  | 1.926007  |
| 1 | 0.135358  | 0.900410  | 2.417942  |

|   |           |           |           |
|---|-----------|-----------|-----------|
| 1 | -1.394396 | -0.022562 | 2.287825  |
| 1 | -1.404048 | 1.751563  | 2.163876  |
| 1 | -0.486024 | -1.405310 | 0.510986  |
| 8 | 1.447549  | -0.626599 | 0.649281  |
| 6 | 0.303847  | -0.879016 | -1.401522 |
| 8 | 0.897504  | -2.147130 | -1.609555 |
| 1 | 0.901923  | -0.078048 | -1.862008 |
| 1 | -0.679471 | -0.890731 | -1.881073 |
| 1 | 1.709371  | -2.138687 | -1.081851 |
| 1 | 1.388695  | -0.923738 | 1.565190  |
